# Supplementary material for: New Bacillus subtilis Strains Isolated from Prosopis glandulosa Rhizosphere for Suppressing Fusarium Spp. and Enhancing Growth of Gossypium hirsutum L
Source: MDPI journal article supplement (doi:10.3390/biology12010073), 2022-12-31
Supplement: s1 [file s1]

Supplementary

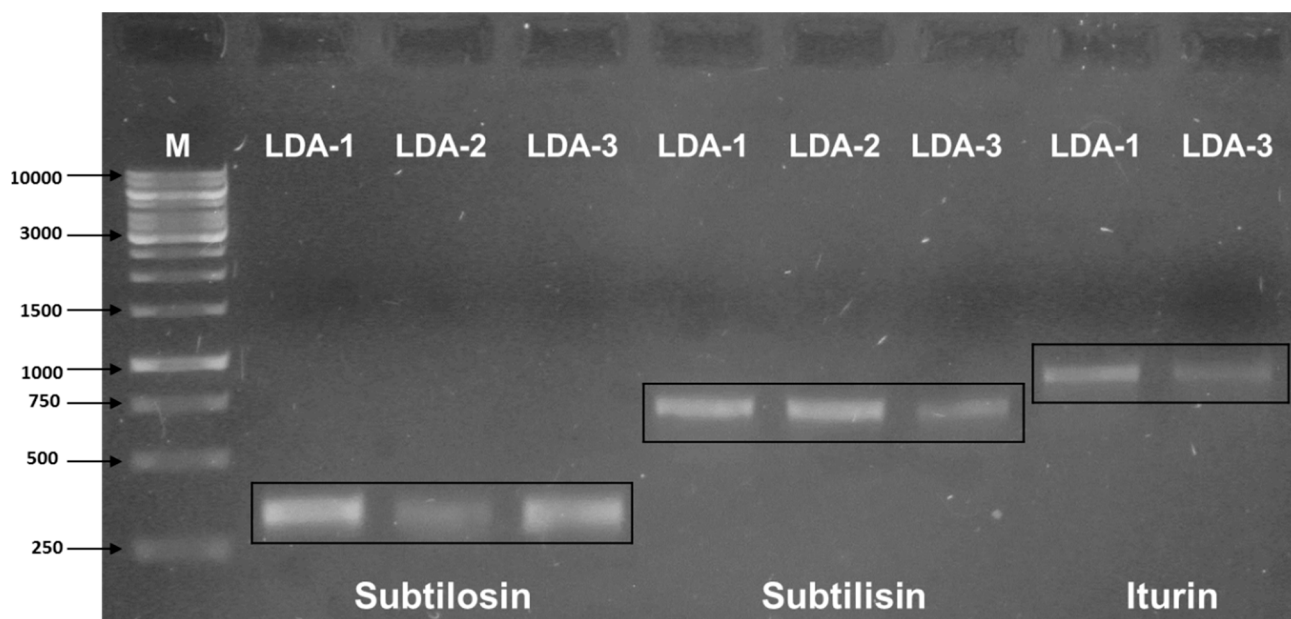

Supplementary Figure S1: PCR amplification of Lipopeptides (subtilisin, subtilisin and iturin) genes from *B. subtilis* strains (LDA-1, LDA-2 and LDA-3).
